## Safety and efficacy of antithrombotic therapy according to stroke and bleeding risk in patients with atrial fibrillation and acute coronary syndrome or PCI: insights from AUGUSTUS

R. Harskamp<sup>1</sup>, R.D. Lopes<sup>2</sup>, Z. Li<sup>2</sup>, D. Wojdyla<sup>2</sup>, S.G. Goodman<sup>3</sup>, R. Aronson<sup>4</sup>, S. Windecker<sup>5</sup>, R. Mehran<sup>6</sup>, C.B. Granger<sup>2</sup>, J.H. Alexander<sup>2</sup>

<sup>1</sup>Amsterdam UMC - Location Academic Medical Center, Amsterdam, Netherlands (The); <sup>2</sup>Duke Clinical Research Institute, Duke University School of Medicine, Durham, United States of America; <sup>3</sup>Canadian Vigour Center, University of Alberta and St Michael's Hospital, University of Toronto, Edmonton, Canada; <sup>4</sup>Bristol-Myers Squibb, Lawrenceville, United States of America; <sup>5</sup>Bern University Hospital, Inselspital, Bern, Switzerland; <sup>6</sup>The Zena and Michael A. Wiener Cardiovascular Institute, Icahn School of Medicine at Mount Sinai, and Cardiovascular Research Foundation, New York, United States of America

On behalf of AUGUSTUS

**Funding Acknowledgement:** Type of funding source: Private grant(s) and/or Sponsorship. Main funding source(s): The Augustus trial was sponsored by Bristol-Myers Squibb and Pfizer, Inc

**Background:** The AUGUSTUS trial showed that patients with atrial fibrillation (AF) and acute coronary syndrome (ACS) and/or PCI treated with a P2Y12 inhibitor and apixaban resulted in less bleeding and comparable ischemic events compared with regimens that included a vitamin K antagonist (VKA), aspirin, or both. We assessed the effect of apixaban versus VKA and aspirin versus placebo according to patients' baseline risk of stroke and bleeding.

**Methods:** AUGUSTUS randomized 4614 patients in a two-by-two factorial design to open label apixaban or VKA and blinded aspirin or placebo. The primary endpoint was major or clinically relevant nonmajor (CRNM) bleeding over 6 months of follow-up. The effects were assessed stratified by baseline CHA2DS2-VASc and HAS-BLED score using Cox proportional hazards models.

**Results:** 4386 patients were included for this analysis. The median age was 71 (64–77) years, 29.4% were female, 81.7% had a CHA2DS2-VASc

score  $\geq 3$ , and 66.8% a HAS-BLED score  $\geq 3$ . As shown in the table, rates of bleeding were lower with apixaban (vs VKA) irrespective of baseline bleeding risk (p-value interaction: 0.23). Aspirin (vs placebo) was associated with increased bleeding irrespective of baseline risk (p-value interaction: 0.88). Apixaban use was associated with a lower risk of death or hospitalization without a significant interaction with stroke risk (p-value of interaction=0.53). No differences were found for ischemic outcomes.

**Conclusion:** An antithrombotic regimen including a P2Y12 inhibitor and apixaban is associated with less bleeding and hospitalization compared to a regimen with VKA, aspirin, or both with results consistent across CHA2DS2-VASc, and HAS-BLED scores. Our findings support the use of apixaban and a P2Y12 inhibitor without aspirin during the first 6 months for most patients with AF and ACS and/or PCI, regardless of stroke and bleeding risk.

|                                         | Risk category | Apixaban (event) | VKA (event)     | Hazard ratio (95% CI) | Interaction p-value |
|-----------------------------------------|---------------|------------------|-----------------|-----------------------|---------------------|
| Major or CRNM bleeding (HASBLED)        | $\leq 2$      | 8.8%             | 14.4%           | 0.57 (0.41–0.78)      | 0.23                |
|                                         | $\geq 3$      | 12.1%            | 16.3%           | 0.72 (0.59–0.88)      |                     |
| Death or hospitalization (CHA2DS2-VASc) | $\leq 2$      | 19.7%            | 21.5%           | 0.92 (0.67–1.25)      | 0.53                |
|                                         | $\geq 3$      | 25.0%            | 29.2%           | 0.82 (0.73–0.94)      |                     |
|                                         |               | Aspirin (event)  | Placebo (event) |                       |                     |
| Major or CRNM bleeding (HASBLED)        | $\leq 2$      | 15.1%            | 8.4%            | 1.86 (1.36–2.56)      | 0.88                |
|                                         | $\geq 3$      | 17.8%            | 10.4%           | 1.81 (1.47–2.23)      |                     |
| Death or hospitalization (CHA2DS2-VASc) | $\leq 2$      | 21.7%            | 19.5%           | 1.09 (0.80–1.49)      | 0.90                |
|                                         | $\geq 3$      | 27.8%            | 26.4%           | 1.07 (0.94–1.21)      |                     |
